# Supplementary material
Source: PubMed Central journal article supplement (PMC3221932)
Supplement: NIHMS321227-supplement-01.pdf [file NIHMS321227-supplement-01.pdf]

## Supplemental Figure Legends

**S1.** Carbon tetrachloride-induced liver fibrosis and serum liver enzymes were not significantly different in BALB/c and TKO mice. Mice were injected intraperitoneally with oil alone (cntrl) or 20ug of carbon tetrachloride (CCl<sub>4</sub>) once per week for 6WK. Mice were sacrificed on WK7 and the liver and serum collected. **A)** μmoles hydroxyproline per gram of liver, **B)** total liver hydroxyproline, **C)** serum alanine transferase (ALT/GPT) and **D)** alkaline phosphatase (AP).

**S2.** Exacerbated liver fibrosis in mice lacking endogenous regulators of IL-13. All eight groups of mice were infected with *S.mansoni* as described for Figures 3A-B. For the same groups of mice we determined **A)** μmoles hydroxyproline per gram of liver and **B)** total liver hydroxyproline. Liver hydroxyproline determination was made from 2 portions of liver from individual mice and reported here as Mean±SEM: Average amount of liver used for hydroxyproline assays follows: BALB/c 159.9 mg ± 12.2[N=9]; IL-13Rα2<sup>-/-</sup> 143.1mg ±12.5[N=8]; IL-10<sup>-/-</sup> 126.5mg ±6.9[N=8], IL-12<sup>-/-</sup> 167mg ±10.1 [N=7]; IL-10/IL-12(p40)<sup>-/-</sup> 140.9mg ±10.2[N=8]; IL-12(p40)/IL-13Rα2<sup>-/-</sup> 113.8mg ±8.6[N=9]; IL-10/IL-13Rα2<sup>-/-</sup> 158.9mg ±9.6[N=9] and IL-10/IL-12(p40)/IL-13Rα2<sup>-/-</sup> 142.8mg ±11.04[N=6].

**S3.** Real time PCR of liver RNA from BALB/c and TKO mice infected with 35 cercariae of *S. mansoni* and euthanized at 8 wk pi; gene expression is presented as the 'fold increase' relative to that in liver from naïve mice. Genes encoding fibrosis-associated molecules: procollagen type I (a1), procollagen type III (a1), matrix metalloprotease-12 (*Mmp12*), MMP-13 (*MMP13*) and tissue inhibitor of matrix metalloprotease (*Timp1*).

**S4.** Treatment with anti-IL-13 Ab ameliorates liver fibrosis. BALB/c and TKO mice were infected with 35 cercariae of *S.mansoni* as described for Figure 5A. For the same four groups of mice we determined **A)** μmoles hydroxyproline per gram of liver and **B)** total liver hydroxyproline. Liver hydroxyproline determination was made from 2 portions of liver from individual mice and reported here as the Mean±SEM. Average amount of liver used for hydroxyproline assays: BALB/c treated with cntrl IgG 167mg ± 7.7 [N=7]; BALB/c treated with anti-IL-13 166.0mg ±8.9 [N=8]; TKO treated with cntrl IgG 128.6 ±9.9 [N=9] and TKO treated with anti-IL-13 150.4 ±4.9[N=8].
